# Supplementary material for: Boosting electrocatalytic nitrate reduction to ammonia with a Cu/Ag-Ru tandem catalyst at industrial-scale current density
Source: Royal Society of Chemistry journal article supplement (doi:10.1039/d4ta08066a), 2025-01-01
Supplement: d4ta08066a1.pdf [file d4ta08066a1.pdf]

## Supplementary Information

### **Boosting electrocatalytic nitrate reduction to ammonia with a Cu/Ag-Ru tandem catalyst at industrial-scale current density**

*Ru Jia*<sup>a,b,†</sup>, *Xiaoxue Zhang*<sup>a,b,†</sup>, *Li Gan*<sup>a,b</sup>, *Muhammad Tahir*<sup>c</sup>, *Zhen-Feng Huang*<sup>a,b,\*</sup>, *Lun Pan*<sup>a,b</sup>, *Ruijie Gao*<sup>a,b</sup>, *Chengxiang Shi*<sup>a,b</sup>, *Xiangwen Zhang*<sup>a,b</sup>, *Guidong Yang*<sup>d</sup> and *Ji-Jun Zou*<sup>a,b,\*</sup>.

<sup>a</sup>Key Laboratory for Green Chemical Technology of the Ministry of Education, School of Chemical Engineering and Technology, Institute of Molecular Plus, Tianjin University, Tianjin 300072, China.

<sup>b</sup>Collaborative Innovative Center of Chemical Science and Engineering (Tianjin), Tianjin 300072, China.

<sup>c</sup>Department of Physics, Division of Science and Technology, University of Education, Lahore, 54770, Pakistan.

<sup>d</sup>XJTU-Oxford International Joint Laboratory for Catalysis, School of Chemical Engineering and Technology, Xi'an Jiaotong University, Xi'an, Shaanxi 710049, China.

\*Corresponding author E-mail address: [jj\\_zou@tju.edu.cn](mailto:jj_zou@tju.edu.cn) (J.-J. Zou) & [zfhuang@tju.edu.cn](mailto:zfhuang@tju.edu.cn) (Z.-F. Huang).

†These authors contributed equally to this work.

## **S1. Experiment section**

### **1.1. NH<sub>4</sub><sup>+</sup> Quantification**

The concentration of produced NH<sub>3</sub> was determined by the indophenol blue method<sup>1</sup>. First, the post-reaction electrolyte was diluted to some extent within the detection range of standard curves. Then, 2 mL of diluted sample was mixed with 2 mL of 1 M NaOH aqueous solution containing 5 wt% sodium citrate and 5 wt% salicylic acid. Next, 1 mL of 0.05 M NaClO and 0.2 mL of 1 wt% sodium nitroferricyanide were introduced and the solution was mixed entirely. After standing for 2 h to complete the colour reaction, the absorption spectrum was then measured using an ultraviolet-visible spectrophotometer (UV-2600) in the wavelength range from 550 nm to 750 nm, recording the absorption intensity at a wavelength of 655 nm. A series of different concentrations of NH<sub>4</sub>Cl solutions were measured to make calibration curves on the purpose of quantify ammonia.

### **1.2. NO<sub>2</sub><sup>-</sup> Quantification**

The post-reaction electrolyte was diluted to some extent within the detection range of standard curves. 5 mL of diluted solution was mixed with 0.1 mL of 1M HCl aqueous solution consisting of 0.5 g sulfonamide. After standing for 10 min, another 0.1 mL solution prepared by 20 mL ultra-pure water and 0.02 g N-(1-naphthyl) ethylenediamine dihydrochloride were introduced<sup>5</sup>. Then the mixture was shaken well and placed in dark for 20 min. The absorption spectrum was measured using an ultraviolet-visible spectrophotometer (UV-2600) in the wavelength range of 450-650 nm, recording the absorption intensity at 540 nm. A series of different concentrations of KNO<sub>2</sub> solutions were measured to make calibration curves on the purpose of quantify nitrite.

### **1.3. NO<sub>3</sub><sup>-</sup> Quantification**

Dilute the post-electrolysis electrolyte to an appropriate concentration. Then take out 5 mL of the diluted sample, add 0.10 mL of 2.0 M HCl solution, shake and mix them entirely, and stand for 5 minutes. The absorption spectrum was then measured using an ultraviolet-visible spectrophotometer (UV-2600) in the wavelength range of 200 to 300 nm, recording the absorption intensities at 220 and 275 nm. The final absorbance was calculated by the formula  $A = A_{220 \text{ nm}} - 2A_{275 \text{ nm}}$ . A series of standard  $\text{KNO}_3$  solutions were used to make a standard concentration-absorbance calibration curve to quantify nitrate.

#### 1.4. Electrochemical active surface area (ECSA) determination

The ECSA is calculated as follows:

$$ECSA = C_{dl}/C_s$$

where  $C_{dl}$  is the double layer capacitance and  $C_s$  is the specific capacitance of the sample. A general specific capacitance of  $C_s = 0.040 \text{ mF cm}^{-2}$  was used in this study and  $C_{dl}$  is the slop of half the current difference between anode and cathode versus scan rate at a certain potential. The  $C_{dl}$  determination was measured in a potential window from -0.06 V to 0.04 V vs. RHE at different scan rates of 10, 20, 40, 60, 80, 100  $\text{mV s}^{-1}$ .

#### 1.5. Reaction order calculation

The calculation of reaction order is based on the formula as follows<sup>2</sup>:

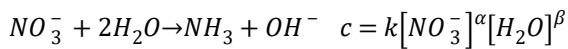

where,  $c$  is the reaction rate of nitrate,  $k$  is the reaction rate constant,  $\alpha$ ,  $\beta$  is the reaction order for nitrate and water, respectively.  $[\text{H}_2\text{O}]^\beta$  can be seemed as a constant, due to  $[\text{H}_2\text{O}] \gg [\text{NO}_3^-]$ . Since the current density  $j$  is linear dependent to the reaction rate  $c$  ( $j = nFc$ ), the above equation can be rewritten as:

$$\ln j = K + \alpha \ln [\text{NO}_3^-]$$

The reaction order  $\alpha$  can be obtained by linearly fit  $\ln j$  with  $\ln [\text{NO}_3^-]$ .

## 1.6. Electron transfer number calculation

The electron transfer number is calculated according to the Koutecky–Levich equation<sup>3</sup>:

$$\frac{1}{i} = \frac{1}{i_k} + \frac{1}{0.62nFAD_0^{2/3}\omega^{1/2}\nu^{-1/6}C_0}$$

where  $i$  is the current (A),  $i_k$  refers to the limiting current (A),  $n$  is the electron transfer number,  $F$  is the Faraday constant (96,485 C mol<sup>-1</sup>),  $A$  is the specific area of the RDE (0.19625 cm<sup>2</sup>),  $D_0$  is the diffusion coefficient of the nitrate (1.80 × 10<sup>-5</sup> cm<sup>2</sup> s<sup>-1</sup>)<sup>4</sup>,  $\omega$  is the rotation rate (rpm × 2 π/60, s<sup>-1</sup>),  $\nu$  is the kinematic viscosity (0.0118 cm<sup>2</sup> s<sup>-1</sup>)<sup>5,6</sup>, and  $C_0$  is the bulk concentration of NO<sub>3</sub><sup>-</sup> (10 × 10<sup>-6</sup> mol cm<sup>-3</sup>). The inverse of current  $i$  (A) is proportional to the inverse of the square root of the rotation rate ( $\omega^{-1/2}$ ). The electron transfer number can be calculated through the slope of the fitted plot.

## 1.7. Reaction rate constant calculation

Reaction rate constant ( $k$ ) is analyzed through the formula as follows:

$$C = C_0 \times e^{-kt}$$

Where  $C$  is related to real-time concentration of NO<sub>3</sub><sup>-</sup> or NO<sub>2</sub><sup>-</sup>,  $C_0$  is the initial concentration,  $k$  refers to reaction rate constant, and  $t$  is the reaction time. On purpose of acquire a deeper insight of the NO<sub>3</sub>RR mechanism, we calculate  $k_1$  (NO<sub>3</sub><sup>-</sup> to NO<sub>2</sub><sup>-</sup>) and  $k_2$  (NO<sub>2</sub><sup>-</sup> to NH<sub>3</sub>), respectively.

## 1.8. Calculation of FE, partial current density and NH<sub>3</sub> yield rate

The faraday efficiency (FE) is calculated as follows:

$$FE_{\text{NH}_3} = \frac{(8 \times F \times C_{\text{NH}_3} \times V)}{j \times A \times t}$$

$$FE_{NO_2^-} = \left( \frac{2 \times F \times C_{NO_2^-} \times V}{j \times A \times t} \right)$$

The yield rate of NH<sub>3</sub> (Y<sub>NH3</sub>) is calculated as follows:

$$Y_{NH_3} = \frac{(C_{NH_3} \times V)}{(A \times t)}$$

Where F is the Faraday constant (96,485 mol<sup>-1</sup>), C<sub>NH3</sub> is the molar concentration of NH<sub>3</sub> in post-reaction electrolyte, C<sub>NO2-</sub> is the molar concentration of NO<sub>2</sub><sup>-</sup> in post-reaction electrolyte, V is the volume of the cathodic electrolyte, j is the total current density, A is the electrode geometric area, and t is the reaction time.

The partial current density of NH<sub>3</sub> is calculated as follows:

$$j_{NH_3} = j \times FE_{NH_3}$$

## 1.9. Electrochemical online DEMS test

A certain amount of 1 M KOH and 0.1 M KNO<sub>3</sub> as electrolyte was added into a customized electrochemical cell. Catalysts coated on breathable film with gold plating layer, Ag/AgCl electrodes, Pt wire were treated as the working electrode, reference electrode and counter electrode, respectively. Then, a constant potential at 0 V vs. RHE was applied for 60 s and the corresponding mass signals can be detected. After the electrochemical test is completed and the signal returns to the baseline, repeat this procedure another three times.

## 1.10. Electrochemical in situ ATR-FTIR spectroscopy

In situ ATR-FTIR spectroscopy was obtained with the BRUKER TENSOR. The catalyst ink was prepared by dispersing 6 mg of catalysts in 1 mL of isopropanol solution and then ultrasonicated for 30 min. The NO<sub>3</sub>RR was performed in a custom-made H-cell, in which the Hg/HgO and Pt wire were used as reference electrodes and counter electrode,

respectively. Working electrode was fabricated by dropping 50  $\mu\text{L}$  catalyst ink onto the surface of a wedge-shaped silicon coated with a gold layer, with a certain amount of 1 M KOH and 0.1 M  $\text{KNO}_3$  as electrolyte. The infrared spectra were measured at different potentials after deducting the background at open-circuit voltage.

## S2. Figures and Tables

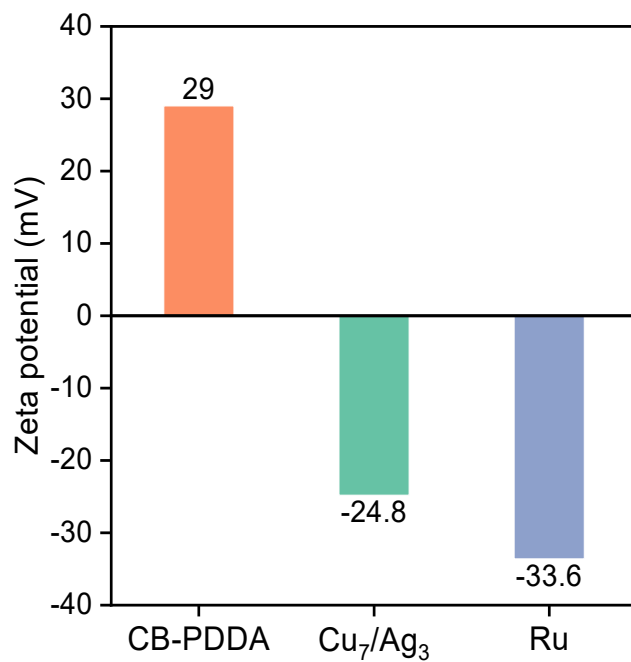

**Figure S1.** Zeta potentials of CB modified with PDDA, Cu<sub>7</sub>/Ag<sub>3</sub> and Ru modified with citrate.

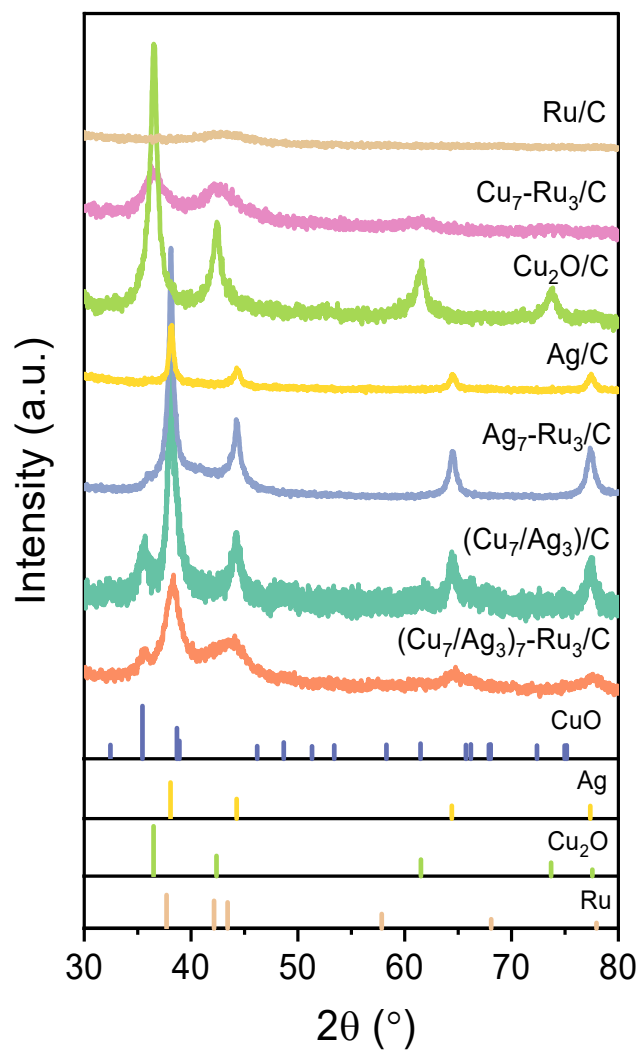

**Figure S2.** The XRD patterns of Ru/C, Cu<sub>7</sub>-Ru<sub>3</sub>/C, Cu/C, Ag/C, Ag<sub>7</sub>-Ru<sub>3</sub>/C, (Cu<sub>7</sub>/Ag<sub>3</sub>)/C, and (Cu<sub>7</sub>/Ag<sub>3</sub>)<sub>7</sub>-Ru<sub>3</sub>/C.



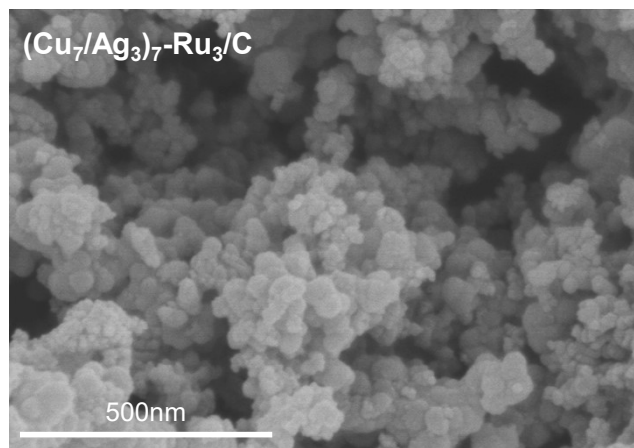

**Figure S3.** SEM image of (Cu<sub>7</sub>/Ag<sub>3</sub>)<sub>7</sub>-Ru<sub>3</sub>/C.

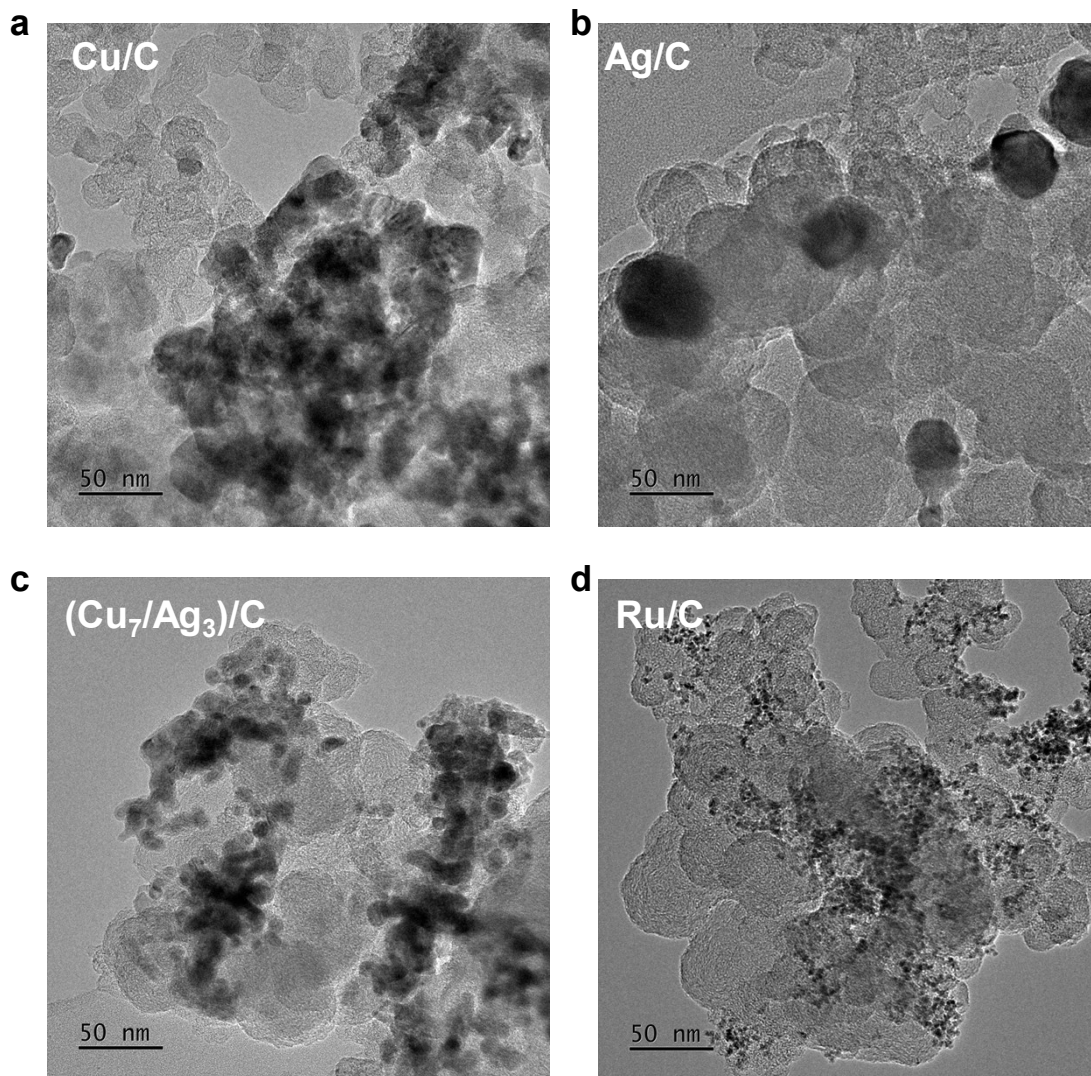

**Figure S4.** TEM images of Cu/C, Ag/C, Ru/C and (Cu<sub>7</sub>/Ag<sub>3</sub>)/C.

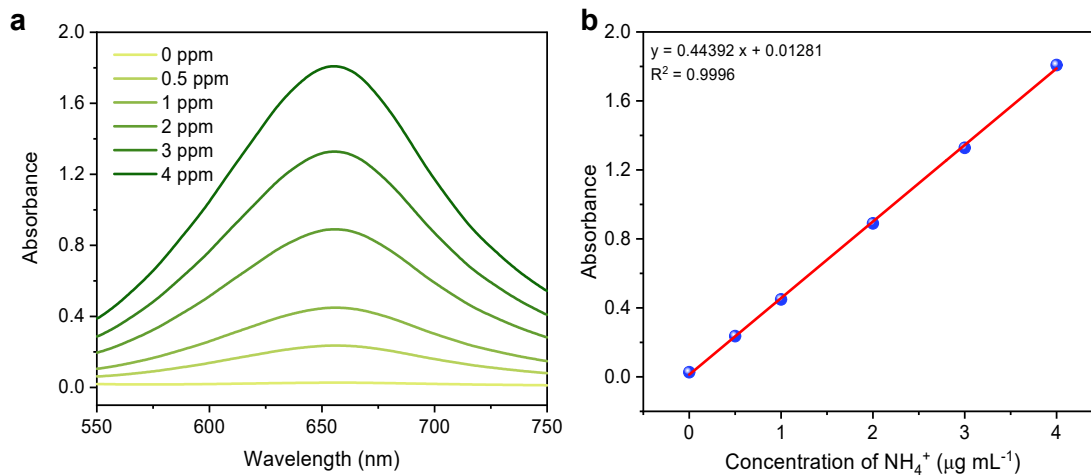

**Figure S5.** The concentration-absorbance UV-vis calibration curve of  $\text{NH}_3$  using different concentration of  $\text{NH}_4\text{Cl}$  solutions as standards. (a) UV-vis curves of indophenol assays with  $\text{NH}_4^+$  ions and (b) linear fitting results of the calibration curve.

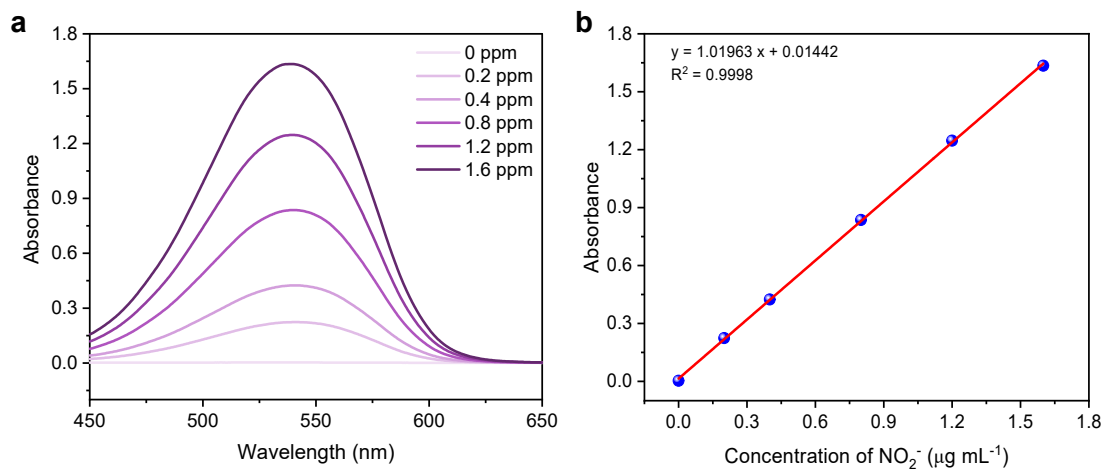

**Figure S6.** The concentration-absorbance UV-vis calibration curve of  $\text{NO}_2^-$  using different concentration of  $\text{KNO}_2$  solutions as standards. (a) UV-vis curves of assays with  $\text{NO}_2^-$  ions and (b) linear fitting results of the calibration curve.

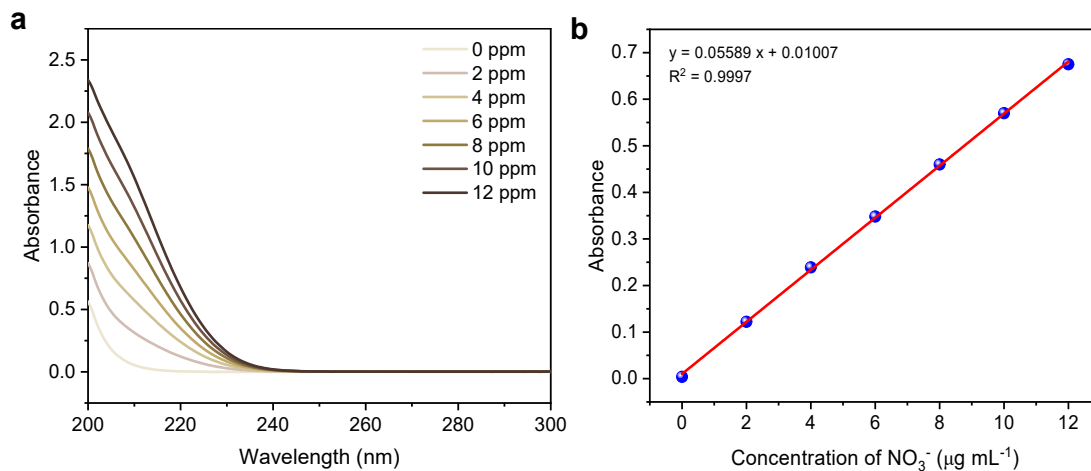

**Figure S7.** The concentration-absorbance UV-vis calibration curve of  $\text{NO}_3^-$  using different concentration of  $\text{KNO}_3$  solutions as standards. (a) UV-vis curves of assays with  $\text{NO}_3^-$  ions and (b) linear fitting results of the calibration curve.

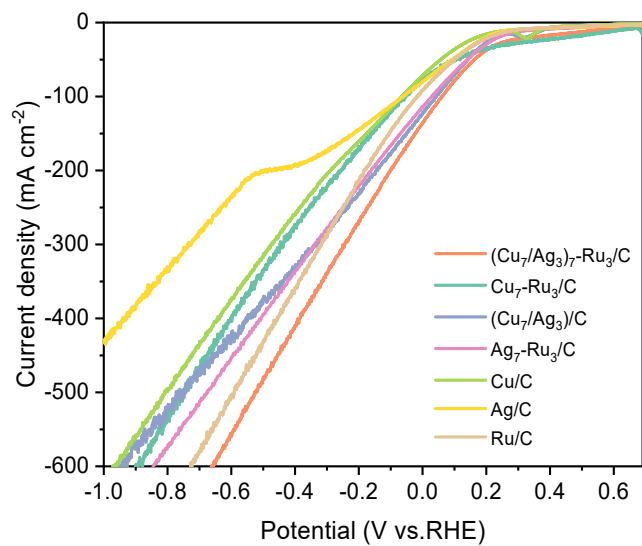

**Figure S8.** LSV curves of (Cu<sub>7</sub>/Ag<sub>3</sub>)<sub>7</sub>-Ru<sub>3</sub>/C, Cu<sub>7</sub>-Ru<sub>3</sub>/C, (Cu<sub>7</sub>/Ag<sub>3</sub>)/C, Ag<sub>7</sub>-Ru<sub>3</sub>/C, Cu/C, Ag/C and Ru/C.

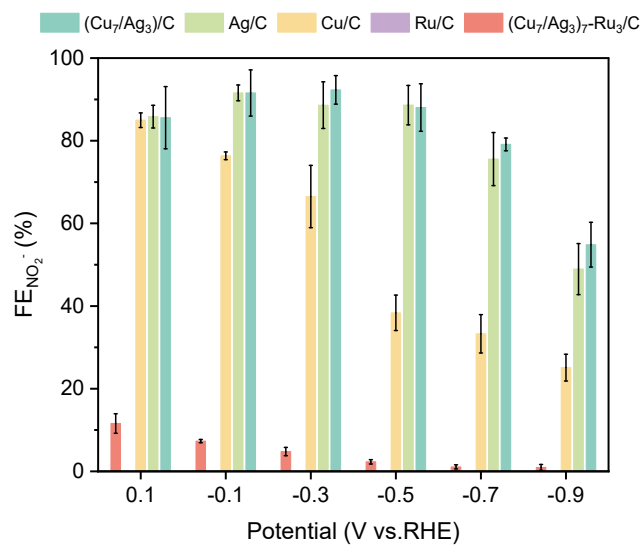

**Figure S9.**  $\text{NO}_2^-$  FEs for  $(\text{Cu}_7/\text{Ag}_3)/\text{C}$ ,  $\text{Cu}/\text{C}$ ,  $\text{Ag}/\text{C}$ ,  $\text{Ru}/\text{C}$ ,  $(\text{Cu}_7/\text{Ag}_3)_7\text{-Ru}_3/\text{C}$  at different applied potentials.

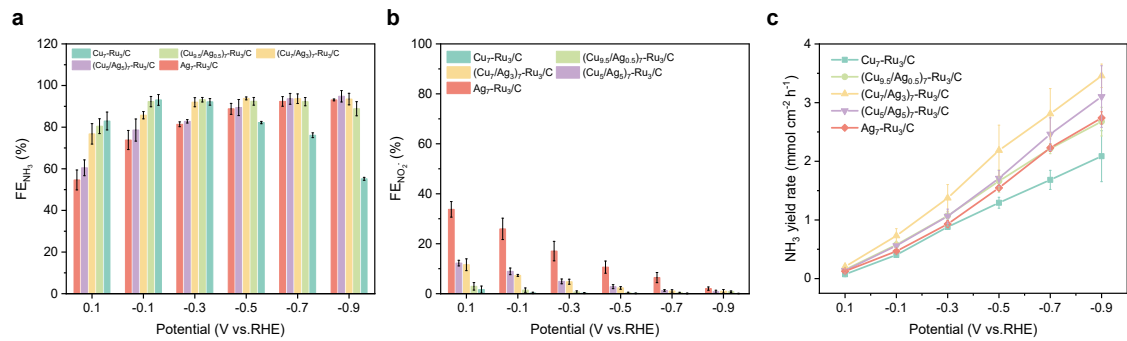

**Figure S10.** FEs of (a) NH<sub>3</sub>, (b) NO<sub>2</sub><sup>-</sup> and (c) the yield rates of NH<sub>3</sub> for Cu<sub>7</sub>-Ru<sub>3</sub>/C, (Cu<sub>9.5</sub>/Ag<sub>0.5</sub>)<sub>7</sub>-Ru<sub>3</sub>/C, (Cu<sub>7</sub>/Ag<sub>3</sub>)<sub>7</sub>-Ru<sub>3</sub>/C, (Cu<sub>5</sub>/Ag<sub>5</sub>)<sub>7</sub>-Ru<sub>3</sub>/C and Ag<sub>7</sub>-Ru<sub>3</sub>/C at different applied potentials.



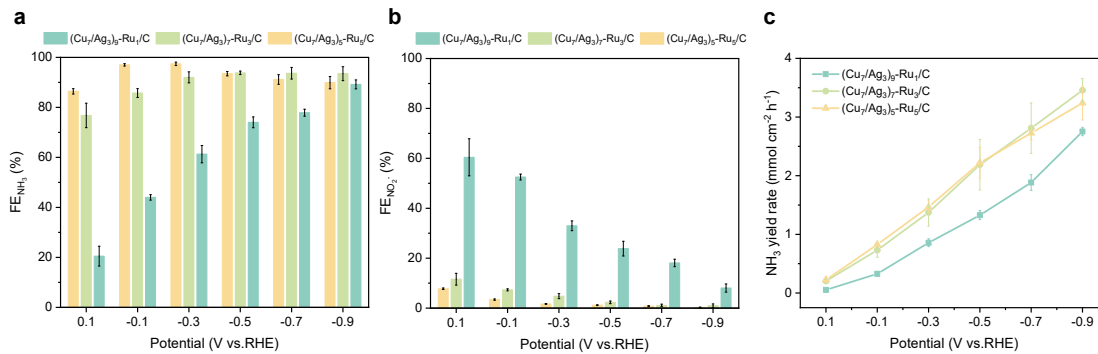

**Figure S11.** FEs of (a)  $\text{NH}_3$ , (b)  $\text{NO}_2^-$  and (c) the yield rates of  $\text{NH}_3$  for  $(\text{Cu}_7/\text{Ag}_3)_9\text{-Ru}_1/\text{C}$ ,  $(\text{Cu}_7/\text{Ag}_3)_7\text{-Ru}_3/\text{C}$  and  $(\text{Cu}_7/\text{Ag}_3)_5\text{-Ru}_5/\text{C}$  at different applied potentials.

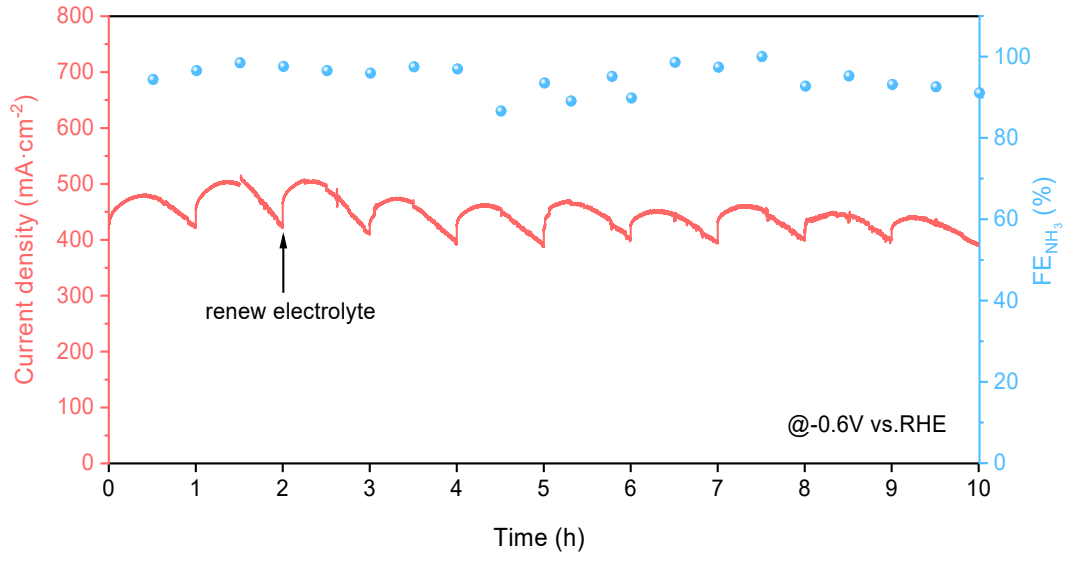

**Figure S12.** Short-term cycling stability testing of  $(\text{Cu}_7/\text{Ag}_3)_7\text{-Ru}_3/\text{C}$ .

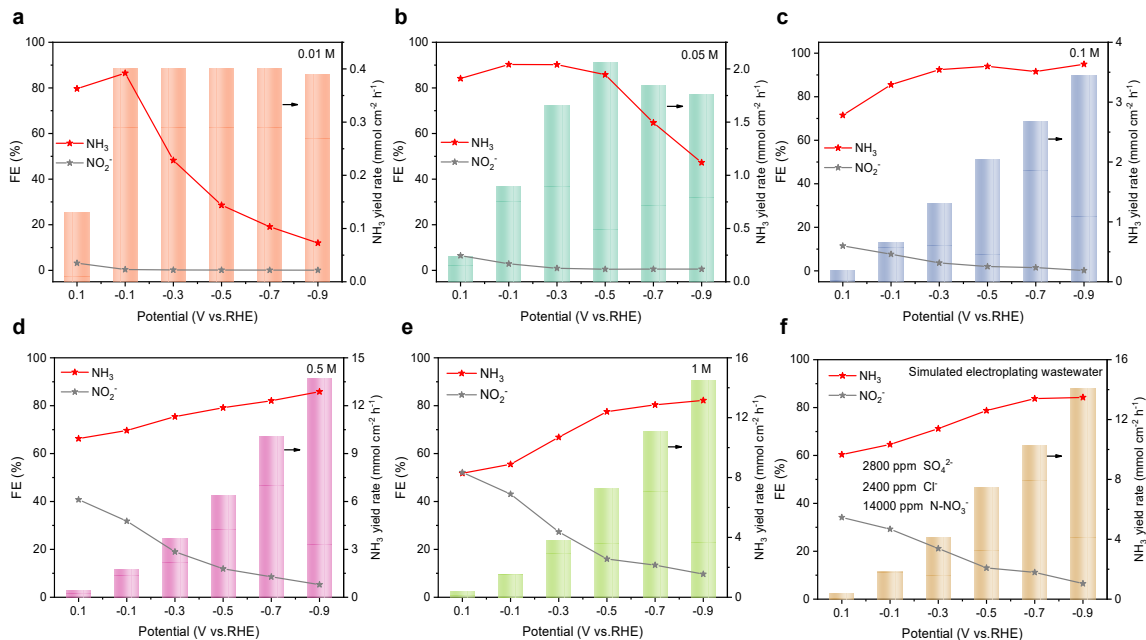

**Figure S13.** (a-e) FEs of  $\text{NH}_3$  and  $\text{NO}_2^-$  as well as  $\text{NH}_3$  yield rates in different concentration of  $\text{NO}_3^-$  with 1 M KOH under various potentials. (f) FEs of  $\text{NH}_3$  and  $\text{NO}_2^-$  as well as  $\text{NH}_3$  yield rates in simulated electroplating wastewater under various potentials.

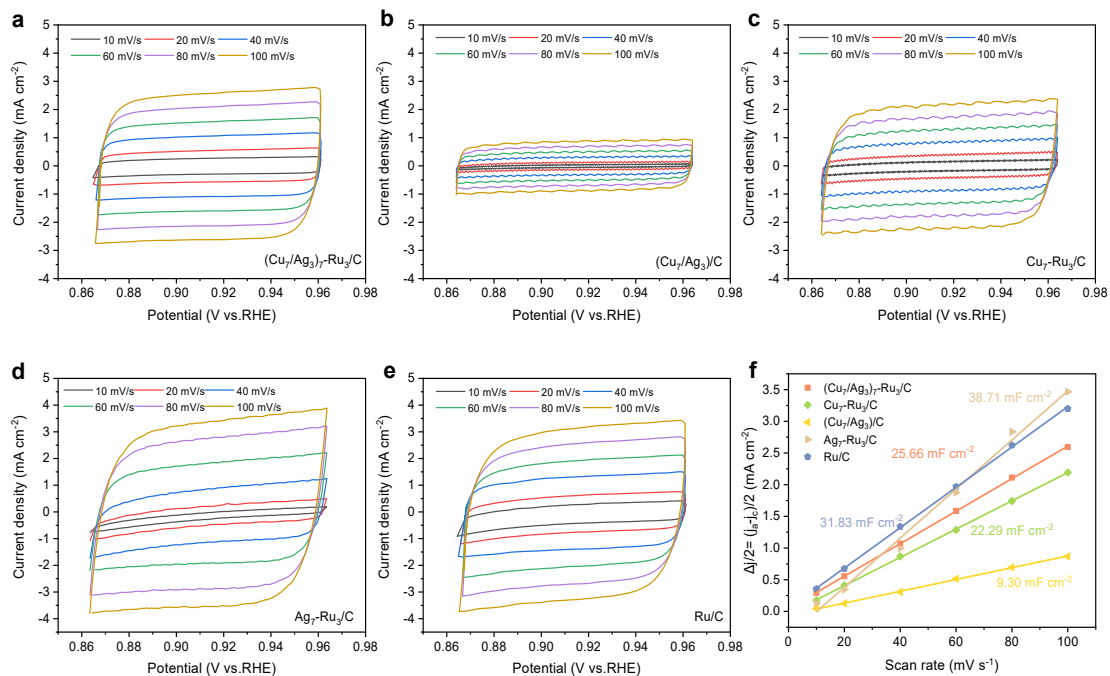

**Figure S14.** (a-e) Cyclic voltammetry curves of five catalysts at different scan rates. (f) Current density differences at 0.91 V vs. RHE against scan rates to calculate  $C_{\text{dl}}$ .

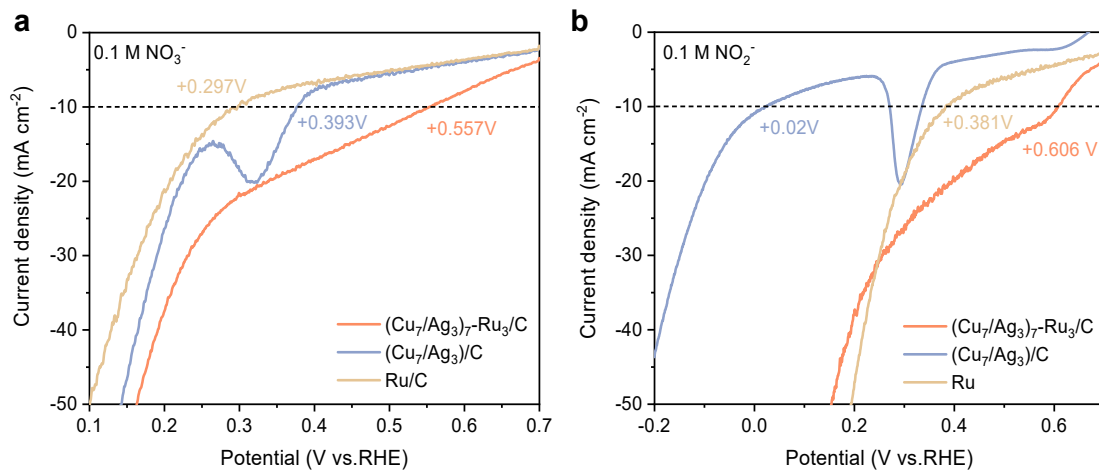

**Figure S15.** LSV curves at low current density in (a) 0.1 M  $\text{NO}_3^-$  and (b) 0.1 M  $\text{NO}_2^-$ .

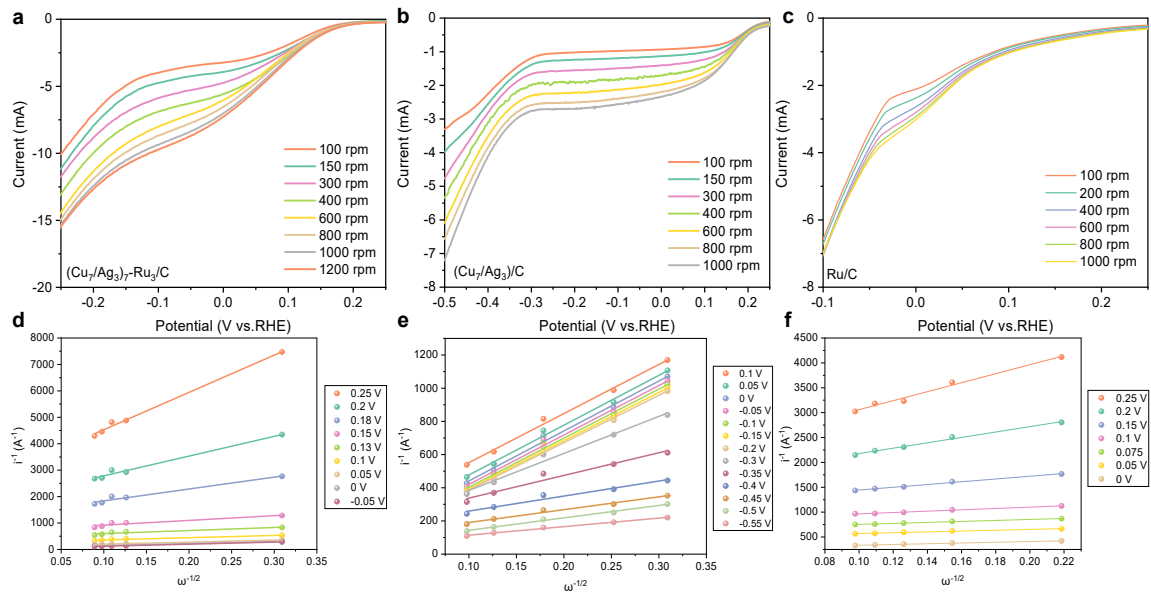

**Figure S16.** (a-c) LSV curves under different rotation rates of  $(\text{Cu}_7/\text{Ag}_3)_7\text{-Ru}_3/\text{C}$ ,  $(\text{Cu}_7/\text{Ag}_3)_3/\text{C}$ , and  $\text{Ru}/\text{C}$ . (d-f) The data fitting of electron transfer number estimation.

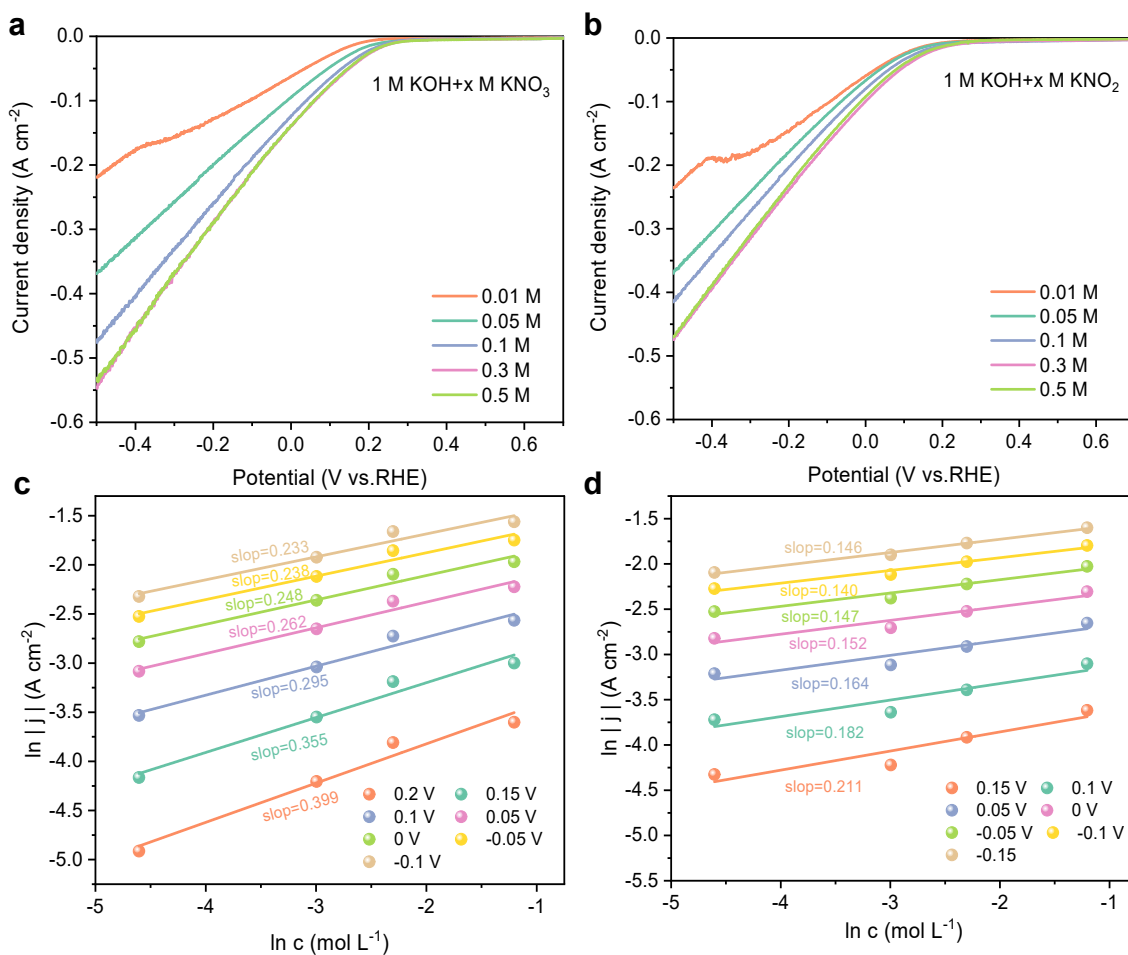

**Figure S17.** (a,b) LSV curves of  $(\text{Cu}_7/\text{Ag}_3)_7\text{-Ru}_3/\text{C}$  in different concentrations of nitrate or nitrite under a stirring of 800 rpm. (c,d) Linear fit of  $\ln |j|$  against  $\ln [c]$  to obtain the reaction rate order.

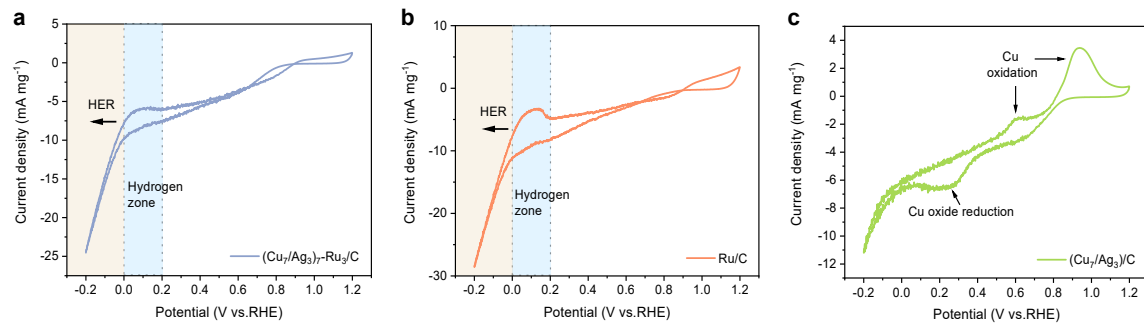

**Figure S18.** CV curves of (a)  $(\text{Cu}_7/\text{Ag}_3)_7\text{-Ru}_3/\text{C}$ , (b)  $\text{Ru}/\text{C}$  and (c)  $(\text{Cu}_7/\text{Ag}_3)/\text{C}$  in 0.1 M KOH solution with a  $5 \text{ mV s}^{-1}$  sweeping speed.



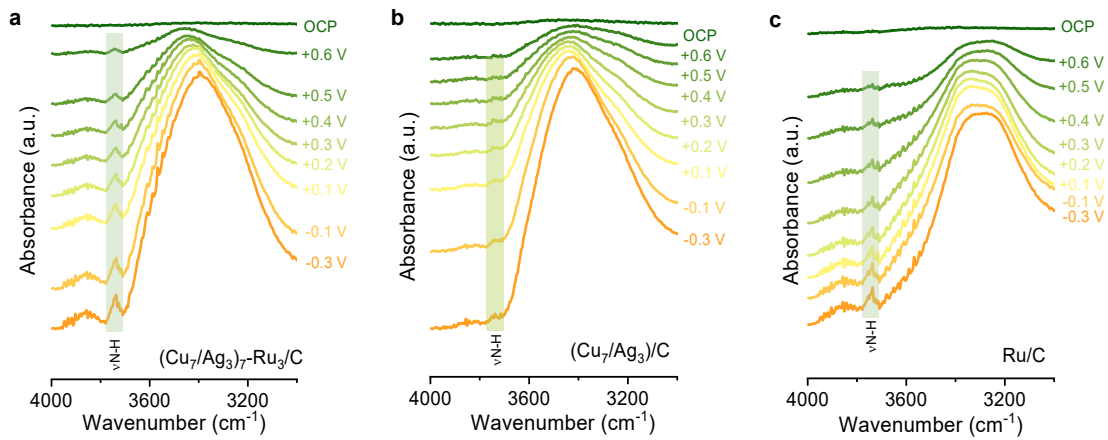

**Figure S19.** Infrared signals in the range of 3000-4000  $\text{cm}^{-1}$  over (a)  $(\text{Cu}_7/\text{Ag}_3)_7\text{-Ru}_3/\text{C}$ , (b)  $\text{Ru}/\text{C}$ , and (c)  $(\text{Cu}_7/\text{Ag}_3)/\text{C}$  in 1 M KOH + 0.1 M  $\text{KNO}_3$ .

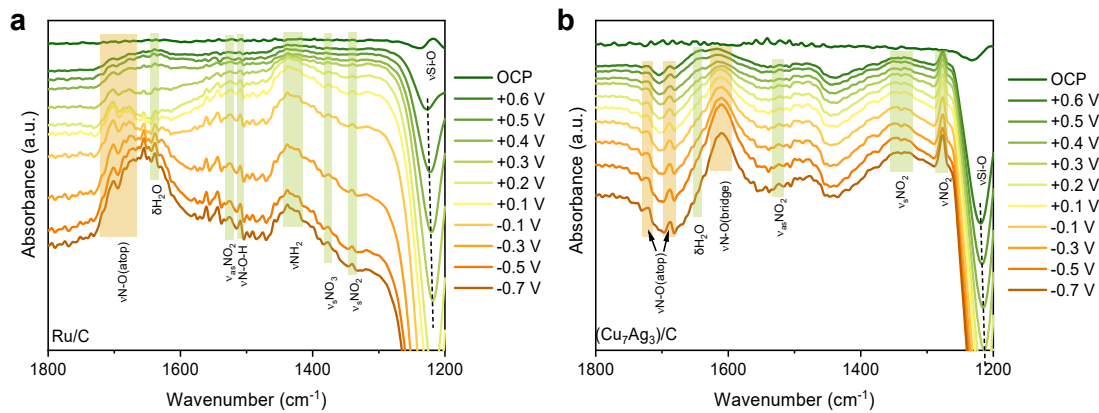

**Figure S20.** Infrared signals in the range of 1800 to 1200  $\text{cm}^{-1}$  over (a) Ru/C and (b) (Cu<sub>7</sub>/Ag<sub>3</sub>)/C, in 1 M KOH + 0.1 M KNO<sub>2</sub>.

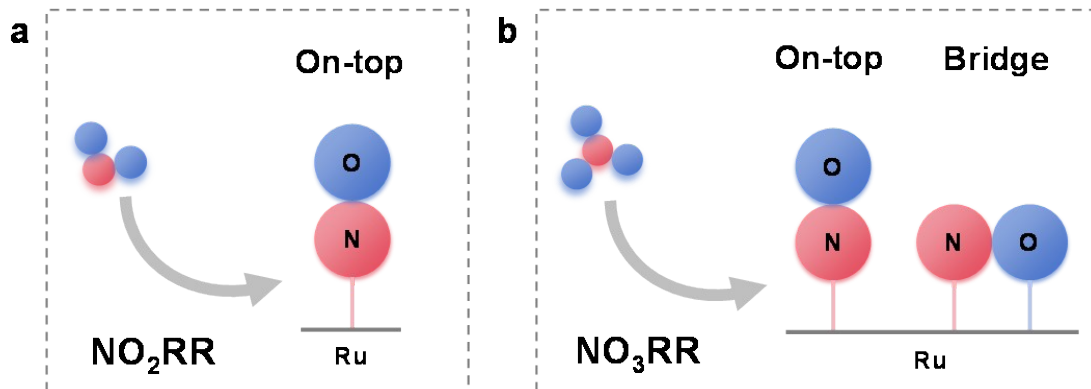

**Figure S21.** The different configuration of NO formed on the surface of Ru in (a)  $\text{NO}_2\text{RR}$  and (b)  $\text{NO}_3\text{RR}$ .

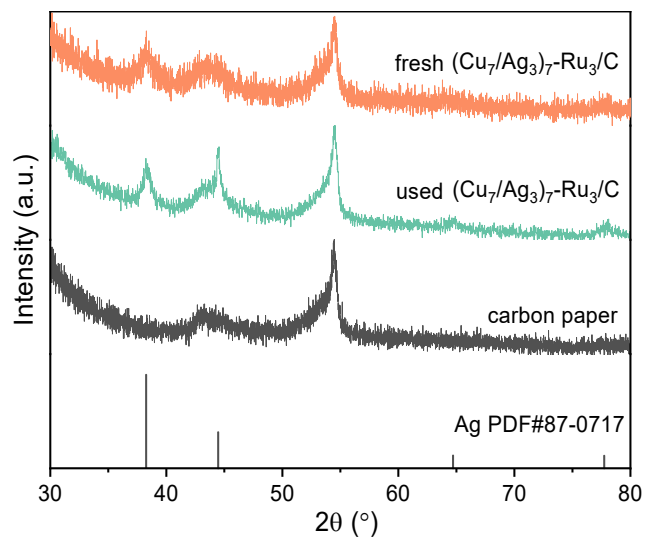

**Figure S22.** XRD patterns of  $(\text{Cu}_7/\text{Ag}_3)_7\text{-Ru}_3/\text{C}$  before and after 60-hour stability test and carbon paper.

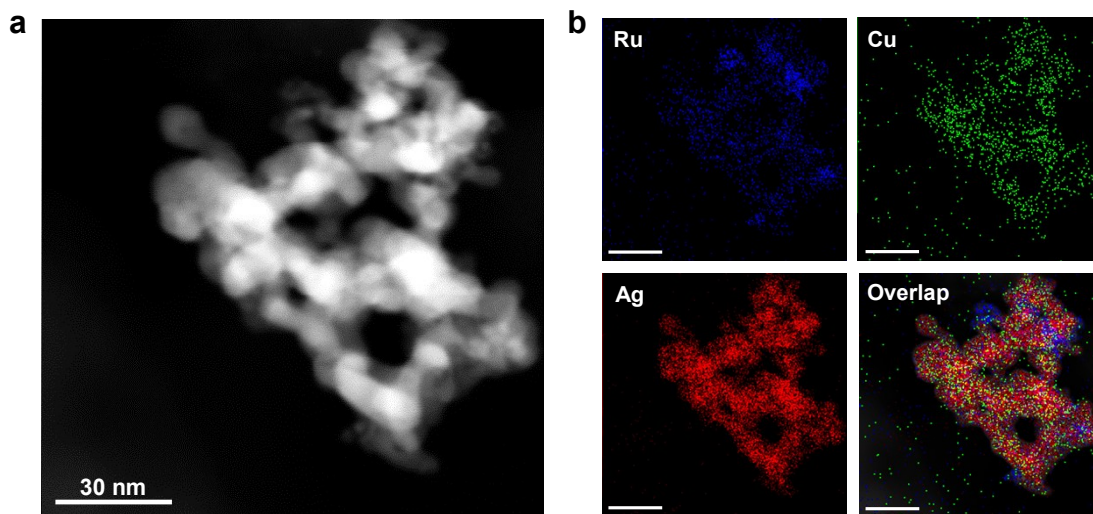

**Figure S23.** (a) The TEM and (b) EDX mapping images of  $(\text{Cu}_7/\text{Ag}_3)_7\text{-Ru}_3/\text{C}$  after 60-hour stability test.

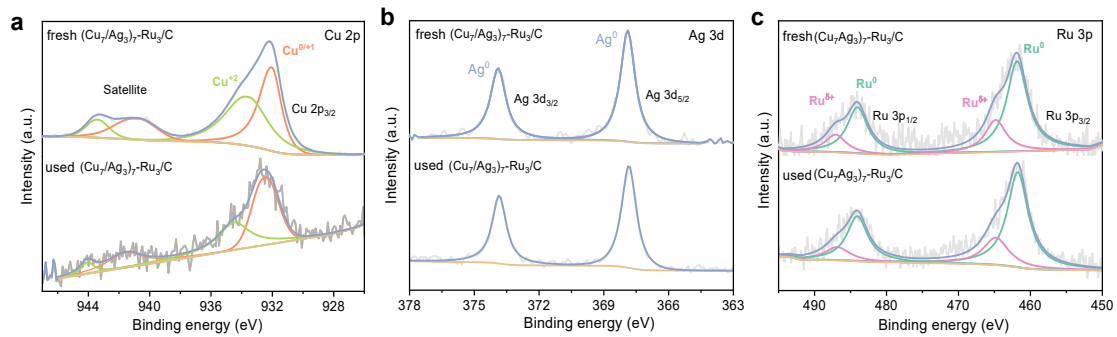

**Figure S24.** The XPS spectra of (a) Cu 2p, (b) Ag 3d, and (c) Ru 3p before and after 60-hour stability test.

**Table S1.** The NO<sub>3</sub>RR performance comparisons between the (Cu<sub>7</sub>/Ag<sub>3</sub>)<sub>7</sub>-Ru<sub>3</sub>/C with other reported catalysts.

| Catalyst                                                                 | Electrolyte                                                                     | FE (%)           | NH <sub>3</sub> yield rate<br>(mmol·h <sup>-1</sup> cm <sup>-2</sup> ) | NH <sub>3</sub> yield rate<br>(mol·h <sup>-1</sup> g <sub>cat</sub> <sup>-1</sup> ) | Ref.         |
|--------------------------------------------------------------------------|---------------------------------------------------------------------------------|------------------|------------------------------------------------------------------------|-------------------------------------------------------------------------------------|--------------|
| (Cu <sub>7</sub> /Ag <sub>3</sub> ) <sub>7</sub> -<br>Ru <sub>3</sub> /C | 1 M KOH +<br>0.1 M KNO <sub>3</sub>                                             | 92.42<br>@-0.3 V | 1.31                                                                   | 0.873                                                                               | This<br>work |
| (Cu <sub>7</sub> /Ag <sub>3</sub> ) <sub>7</sub> -<br>Ru <sub>3</sub> /C | 1 M KOH +<br>0.1 M KNO <sub>3</sub>                                             | 94.93<br>@-0.9 V | 3.45                                                                   | 2.30                                                                                | This<br>work |
| Ru/Cu <sub>2</sub> O                                                     | 1 M KOH +<br>1 M KNO <sub>3</sub>                                               | ~100<br>@-0.2 V  | 2.18                                                                   | -                                                                                   | 7            |
| Cu/Cu <sub>2</sub> O<br>NWAs                                             | 1 M KOH +<br>200 ppm NO <sub>3</sub> <sup>-</sup>                               | 95.8<br>@-0.85 V | 0.2449                                                                 | -                                                                                   | 8            |
| Ru <sub>1</sub> Cu <sub>10</sub> /rGO                                    | 1 M KOH +<br>0.1 M KNO <sub>3</sub>                                             | 98<br>@-0.05 V   | 0.38                                                                   | 0.38                                                                                | 9            |
| Cu-NBs-100                                                               | 1 M KOH +<br>0.1 M KNO <sub>3</sub>                                             | 95<br>@-0.15 V   | 1.3                                                                    | 0.655                                                                               | 10           |
| Strained Ru<br>nanoclusters                                              | 1 M KOH +<br>1 M KNO <sub>3</sub>                                               | 45<br>@-0.8 V    | 1.17                                                                   | 5.56                                                                                | 11           |
| Rh/Cu<br>nanowires                                                       | 0.1 M Na <sub>2</sub> SO <sub>4</sub> +<br>0.1 M NO <sub>3</sub> <sup>-</sup>   | 70<br>@-0.4 V    | 1.27                                                                   | -                                                                                   | 12           |
| NiMoO <sub>4</sub> /CuO<br>NW/CF                                         | 1 M KOH +<br>0.05 M KNO <sub>3</sub>                                            | 98.8<br>@-0.2 V  | 0.8221                                                                 | -                                                                                   | 13           |
| Ru <sub>15</sub> Co <sub>85</sub> HNDs                                   | 1 M KOH +<br>0.1 M KNO <sub>3</sub>                                             | 97<br>@0 V       | 1.926                                                                  | 3.21                                                                                | 14           |
| Ag/Co <sub>3</sub> O <sub>4</sub> /CoO<br>OH NWs                         | 1 M KOH +<br>0.1 M KNO <sub>3</sub>                                             | 94.3<br>@-0.25 V | 0.2537                                                                 | -                                                                                   | 15           |
| Ag <sub>9</sub> NCs                                                      | 0.5 M K <sub>2</sub> SO <sub>4</sub> +<br>50 ppm N-NO <sub>3</sub> <sup>-</sup> | 80.2<br>@-0.95 V | -                                                                      | -                                                                                   | 16           |
| AuCu@Ag<br>NWs                                                           | 1 M KOH +<br>50 ppm N-NO <sub>3</sub> <sup>-</sup>                              | 96.9<br>@-0.2 V  | -                                                                      | 0.057                                                                               | 17           |
| Cu/Cu <sub>2</sub> O                                                     | 0.1 M PB +<br>0.1 M KNO <sub>3</sub>                                            | 93.9<br>@-0.9 V  | 0.2198                                                                 | -                                                                                   | 18           |

## References

1. L. Li, C. Tang, X. Cui, Y. Zheng, X. Wang, H. Xu, S. Zhang, T. Shao, K. Davey and S.-Z. Qiao, *Angew. Chem. Int. Ed.*, 2021, **60**, 14131-14137.
2. O. Q. Carvalho, R. Marks, H. K. K. Nguyen, M. E. Vitale-Sullivan, S. C. Martinez, L. Árnadóttir and K. A. Stoerzinger, *J. Am. Chem. Soc.*, 2022, **144**, 14809-14818.
3. S.-E. Bae, K. L. Stewart and A. A. Gewirth, *J. Am. Chem. Soc.*, 2007, **129**, 10171-10180.
4. D. Pletcher and Z. Poorabedi, *Electrochim. Acta*, 1979, **24**, 1253-1256.
5. Y. Wang, A. Xu, Z. Wang, L. Huang, J. Li, F. Li, J. Wicks, M. Luo, D.-H. Nam, C.-S. Tan, Y. Ding, J. Wu, Y. Lum, C.-T. Dinh, D. Sinton, G. Zheng and E. H. Sargent, *J. Am. Chem. Soc.*, 2020, **142**, 5702-5708.
6. M. Chatenet, M. B. Molina-Concha, N. El-Kissi, G. Parrour and J. P. Diard, *Electrochim. Acta*, 2009, **54**, 4426-4435.
7. Q. Hu, K. Yang, O. Peng, M. Li, L. Ma, S. Huang, Y. Du, Z.-X. Xu, Q. Wang, Z. Chen, M. Yang and K. P. Loh, *J. Am. Chem. Soc.*, 2023, **146**, 668-676.
8. Y. Wang, W. Zhou, R. Jia, Y. Yu and B. Zhang, *Angew. Chem. Int. Ed.*, 2020, **59**, 5350-5354.
9. W. Gao, K. Xie, J. Xie, X. Wang, H. Zhang, S. Chen, H. Wang, Z. Li and C. Li, *Adv. Mater.*, 2023, **35**, 2202952.
10. Q. Hu, Y. Qin, X. Wang, Z. Wang, X. Huang, H. Zheng, K. Gao, H. Yang, P. Zhang, M. Shao and C. He, *Energy Environ. Sci.*, 2021, **14**, 4989-4997.



11. J. Li, G. Zhan, J. Yang, F. Quan, C. Mao, Y. Liu, B. Wang, F. Lei, L. Li, A. W. M. Chan, L. Xu, Y. Shi, Y. Du, W. Hao, P. K. Wong, J. Wang, S.-X. Dou, L. Zhang and J. C. Yu, *J. Am. Chem. Soc.*, 2020, **142**, 7036-7046.
12. H. Liu, X. Lang, C. Zhu, J. Timoshenko, M. Rüscher, L. Bai, N. Guijarro, H. Yin, Y. Peng, J. Li, Z. Liu, W. Wang, B. R. Cuenya and J. Luo, *Angew. Chem. Int. Ed.*, 2022, **61**, e202202556.
13. C. Lin, X. Chen, L. Wang, W. Li, Z. Wang, M. Li, J. Feng, B. Hou and W. Yan, *Adv. Funct. Mater.*, 2024, **34**, 2401287.
14. S. Han, H. Li, T. Li, F. Chen, R. Yang, Y. Yu and B. Zhang, *Nat. Catal.*, 2023, **6**, 402-414.
15. S. Wu, Y. Jiang, W. Luo, P. Xu, L. Huang, Y. Du, H. Wang, X. Zhou, Y. Ge, J. Qian, H. Nie and Z. Yang, *Adv. Sci.*, 2023, **10**, 2303789.
16. L. Liu, S.-J. Zheng, H. Chen, J. Cai and S.-Q. Zang, *Angew. Chem. Int. Ed.*, 2024, **63**, e202316910.
17. S. Liu, W. Miao, K. Ma, H. Teng, X. Zhang, J. Li, W. Li, X. Cui and L. Jiang, *Appl. Catal. B Environ.*, 2024, **350**, 123919.
18. N. Zhou, Z. Wang, N. Zhang, D. Bao, H. Zhong and X. Zhang, *ACS Catal.*, 2023, **13**, 7529-7537.
